# Supplementary material for: Surfactant-free co-solvent exfoliation strategy for semiconducting quasi-1D Nb2Pd3Se8 nanowires
Source: Royal Society of Chemistry journal article supplement (doi:10.1039/d4ce01136h), 2025-01-01
Supplement: d4ce01136h1.pdf [file d4ce01136h1.pdf]

## Electronic Supplementary Information

### Surfactant-free co-solvent exfoliation strategy of semiconducting quasi-1D Nb<sub>2</sub>Pd<sub>3</sub>Se<sub>8</sub> nanowires

Kyung Hwan Choi,<sup>‡b</sup> Yeongjin Kim,<sup>‡a</sup> Jinsu Kang,<sup>a</sup> Kyung In Kim,<sup>a</sup> Jeong Su Park,<sup>a</sup> Hyung-Suk Oh,<sup>a,d,e</sup>  
Hak Ki Yu<sup>\*c</sup> and Jae-Young Choi<sup>\*a,b,e</sup>

<sup>a</sup>School of Advanced Materials Science and Engineering, Sungkyunkwan University, Suwon 16419, Korea

<sup>b</sup>SKKU Advanced Institute of Nanotechnology (SAINT), Sungkyunkwan University, Suwon 16419, Korea

<sup>c</sup>Department of Materials Science and Engineering & Department of Energy Systems Research, Ajou University, Suwon 16499, Republic of Korea.

<sup>d</sup>Clean Energy Research Center, Korea Institute of Science and Technology (KIST), Seoul 02792, Republic of Korea

<sup>e</sup>KIST-SKKU Carbon-Neutral Research Center, Sungkyunkwan University, Suwon 16419, Republic of Korea

\* Corresponding Authors: hakkiyu@ajou.ac.kr (H. K. Yu) and jy.choi@skku.edu (J. Y. Choi)

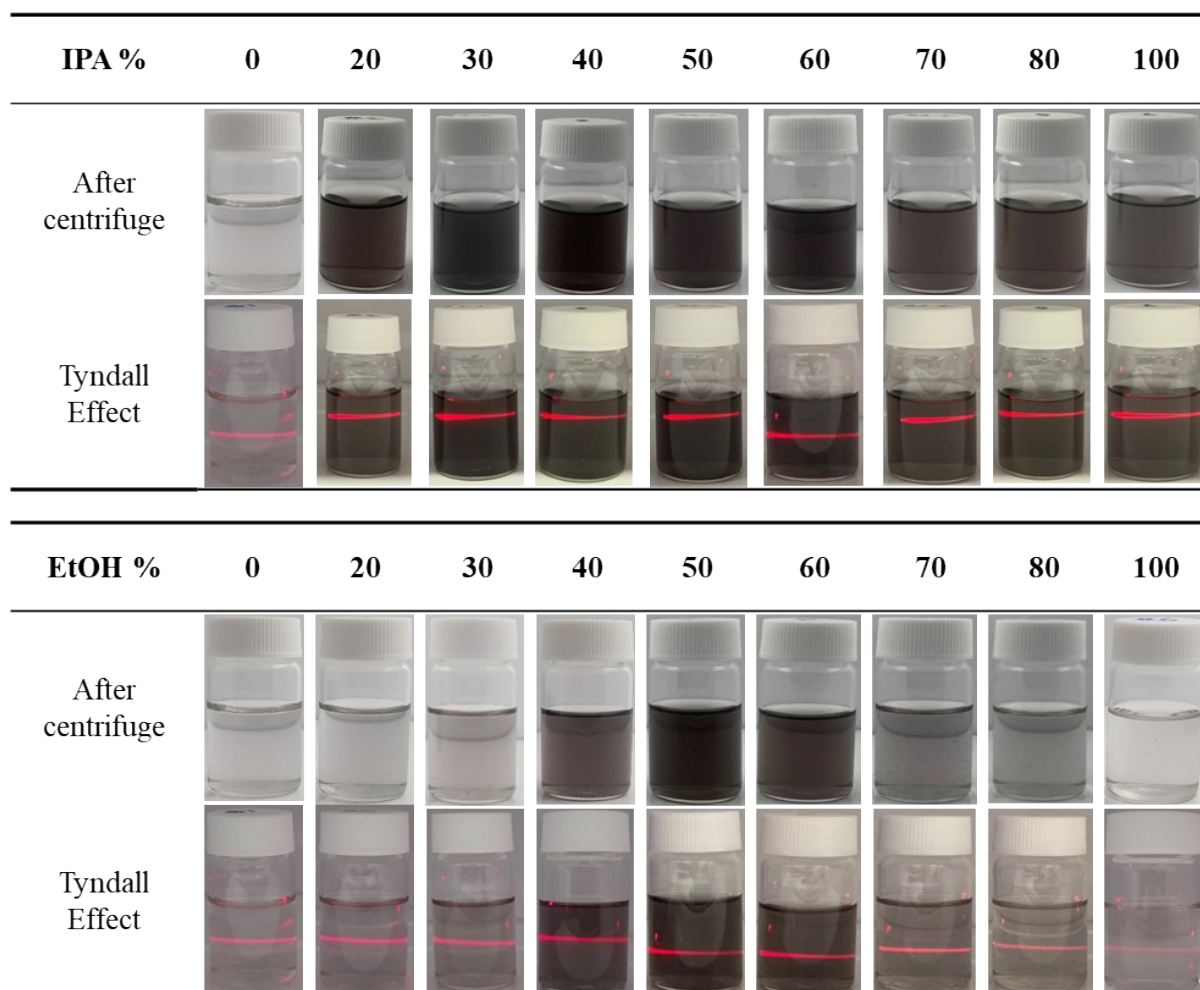

**Fig. S1** Photographs of Nb<sub>2</sub>Pd<sub>3</sub>Se<sub>8</sub> dispersions in all cosolvent system after centrifugation at 6,000 rpm; IPA-water (top) and EtOH-water (bottom).

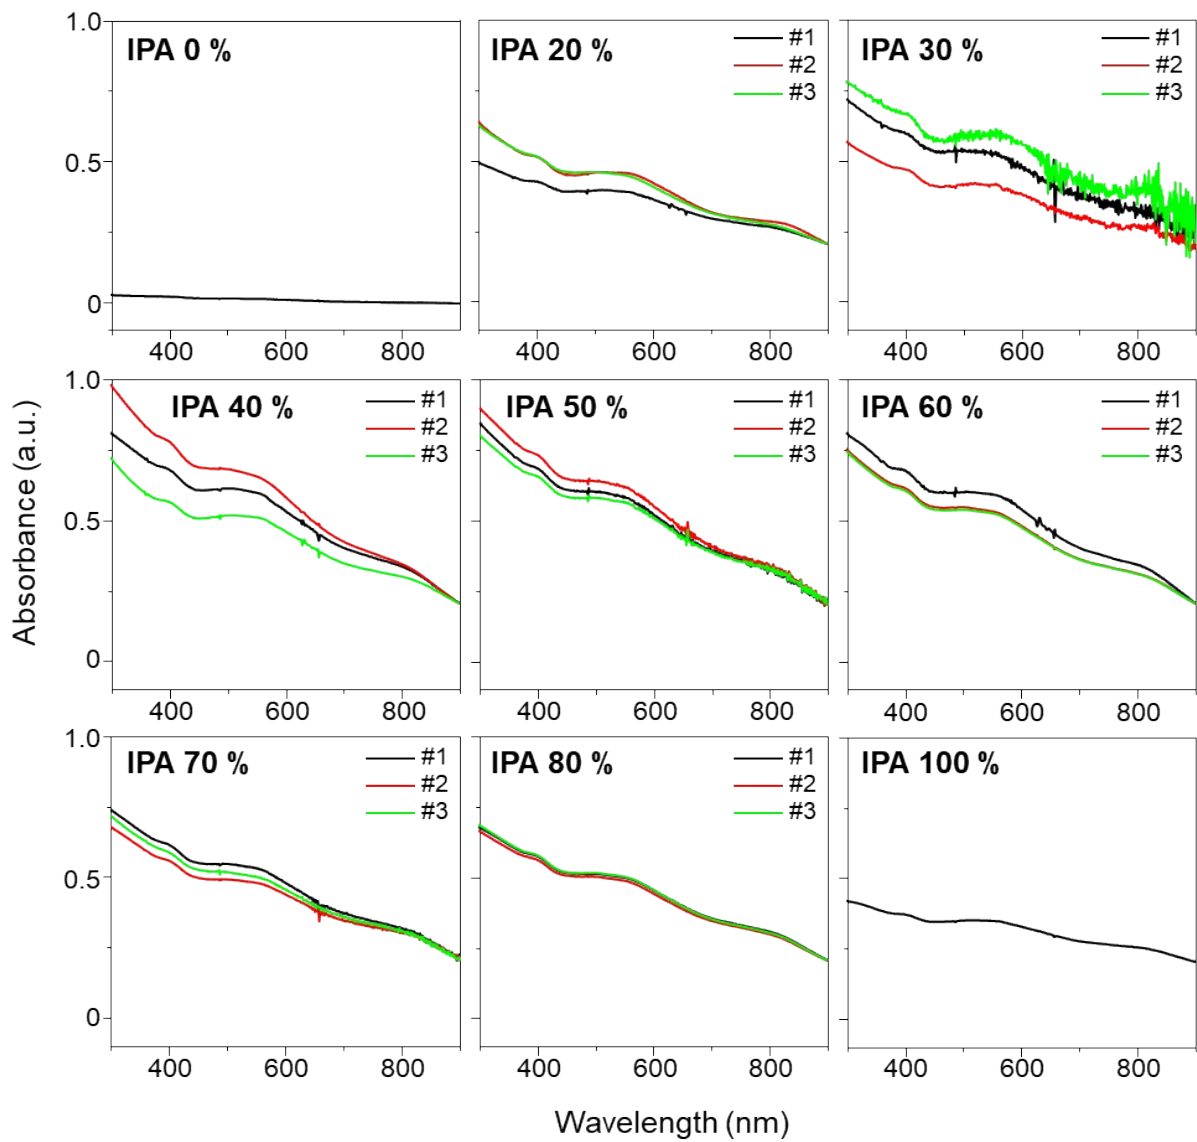

**Fig. S2** UV-visible absorbance spectra of  $\text{Nb}_2\text{Pd}_3\text{Se}_8$  dispersions processed in IPA-water co-solvent.

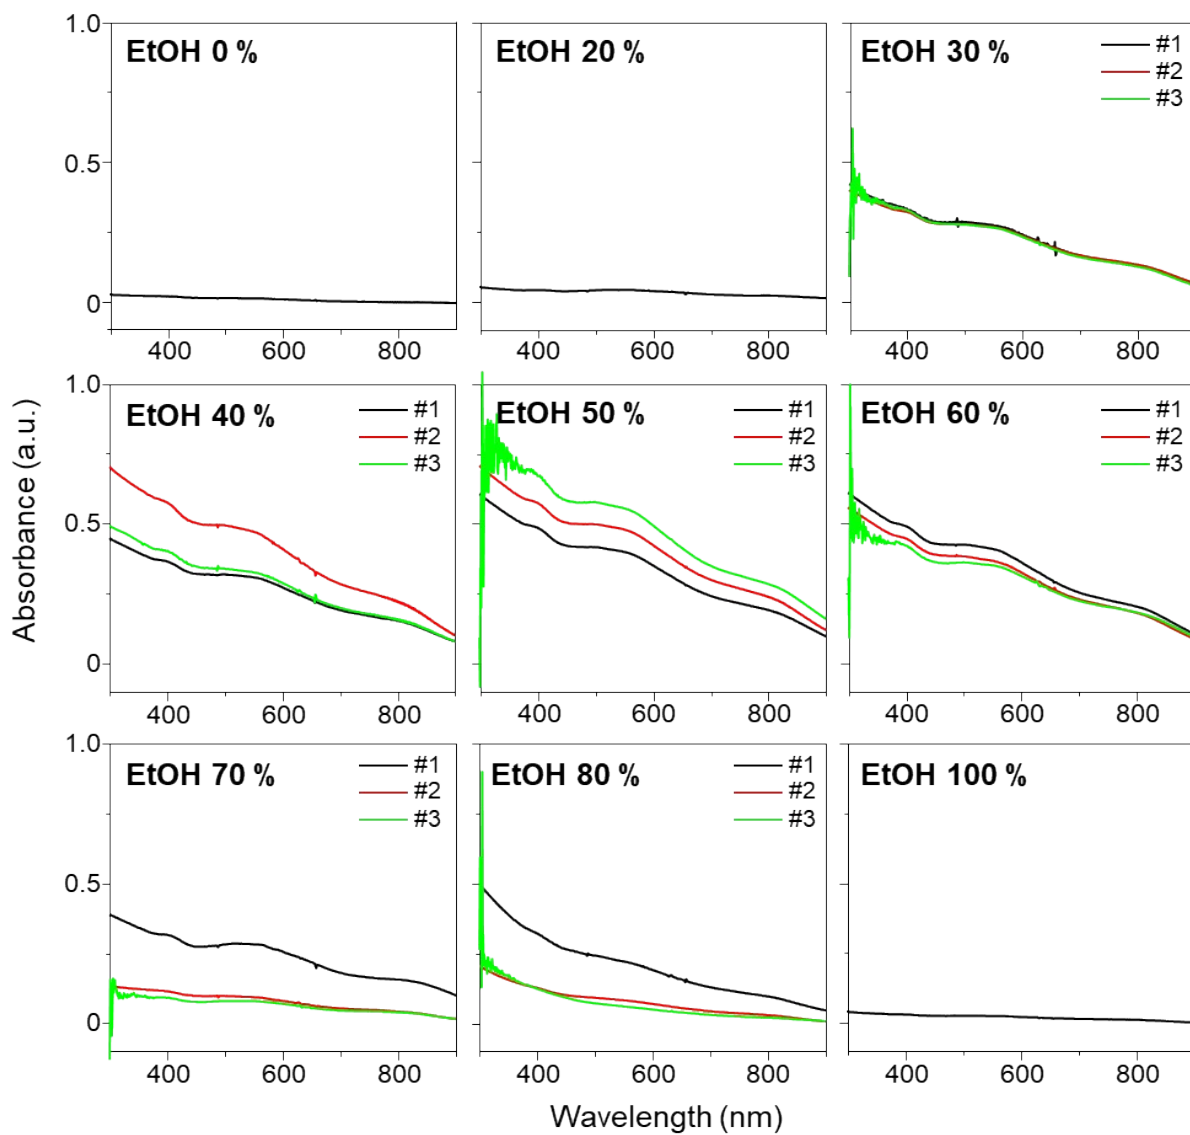

**Fig. S3** UV-visible absorbance spectra of  $\text{Nb}_2\text{Pd}_3\text{Se}_8$  dispersions processed in EtOH-water co-solvent.

| Alcohol                  | Molecular structure                                                               | Molecular weight (g mol <sup>-1</sup> ) | # of -CH <sub>3</sub> |
|--------------------------|-----------------------------------------------------------------------------------|-----------------------------------------|-----------------------|
| Ethyl alcohol (EtOH)     | 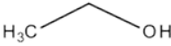 | 46.068                                  | 1                     |
| Isopropyl alcohol (IPA)  |  | 60.1                                    | 2                     |
| Tert-butyl alcohol (TBA) |  | 74.12                                   | 3                     |

**Fig. S4** Information of alcohols used as co-solvents in liquid exfoliation of Nb<sub>2</sub>Pd<sub>3</sub>Se<sub>8</sub>

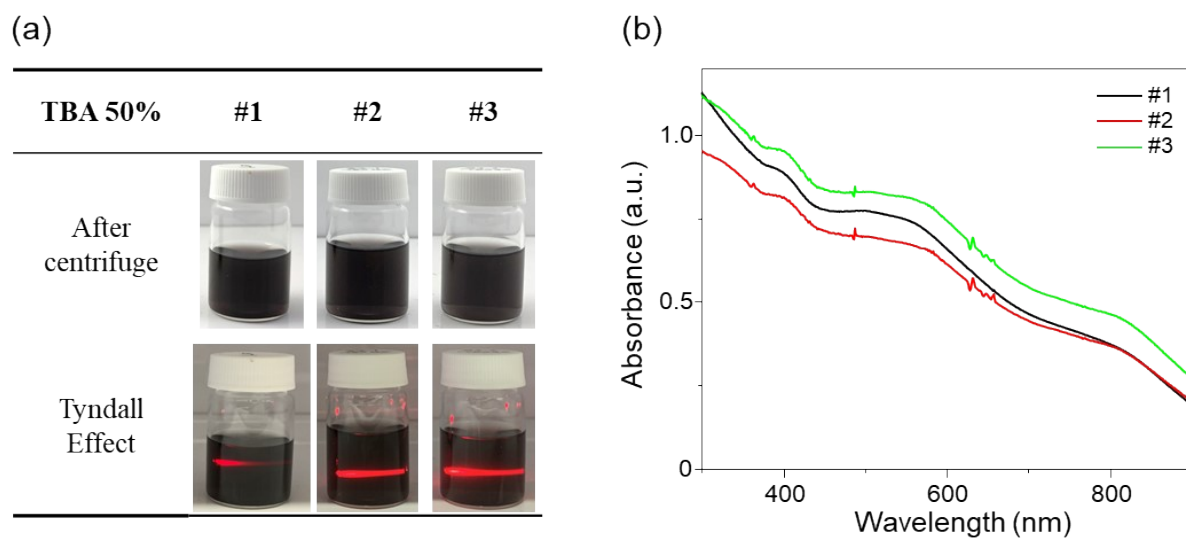

**Fig. S5** Exfoliation results in TBA-water co-solvent. (a) Photographs of  $\text{Nb}_2\text{Pd}_3\text{Se}_8$  dispersions in TBA 50% after centrifugation at 6,000 rpm. (b) UV-visible absorbance spectra of the  $\text{Nb}_2\text{Pd}_3\text{Se}_8$  dispersions.

| <b>Solvents</b> | <b>Absorbance</b> | <b>Width (nm)</b> |
|-----------------|-------------------|-------------------|
| IPA 20%         | 0.514             | 31.3 ± 5.9        |
| IPA 50%         | 0.684             | 21.0 ± 5.4        |
| IPA 70%         | 0.585             | 29.7 ± 4.4        |
| IPA 100%        | 0.371             | 35.8 ± 13.4       |
| EtOH 30%        | 0.330             | 51.6 ± 16.5       |
| EtOH 50%        | 0.575             | 30.4 ± 7.9        |
| EtOH 80%        | 0.128             | 100.3 ± 37.9      |
| NMP             | 0.633             | 23.4 ± 7.0        |

**Fig. S6** Summary of the absorbance and average nanowire widths of different solvent compositions.

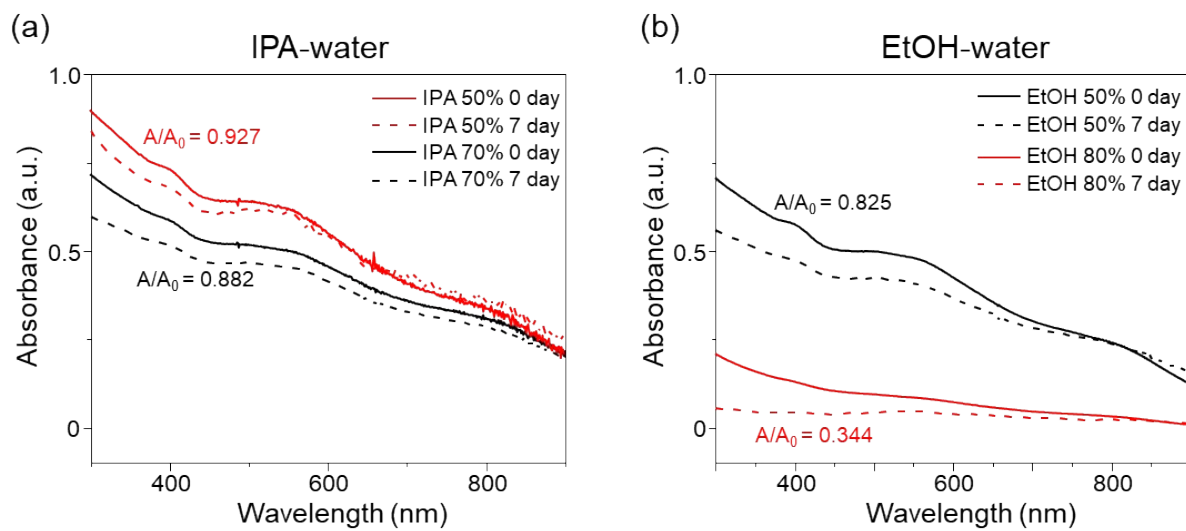

**Fig. S7** Dispersion stability of  $\text{Nb}_2\text{Pd}_3\text{Se}_8$  dispersions exfoliated in (a) IPA-water and (b) EtOH-water.



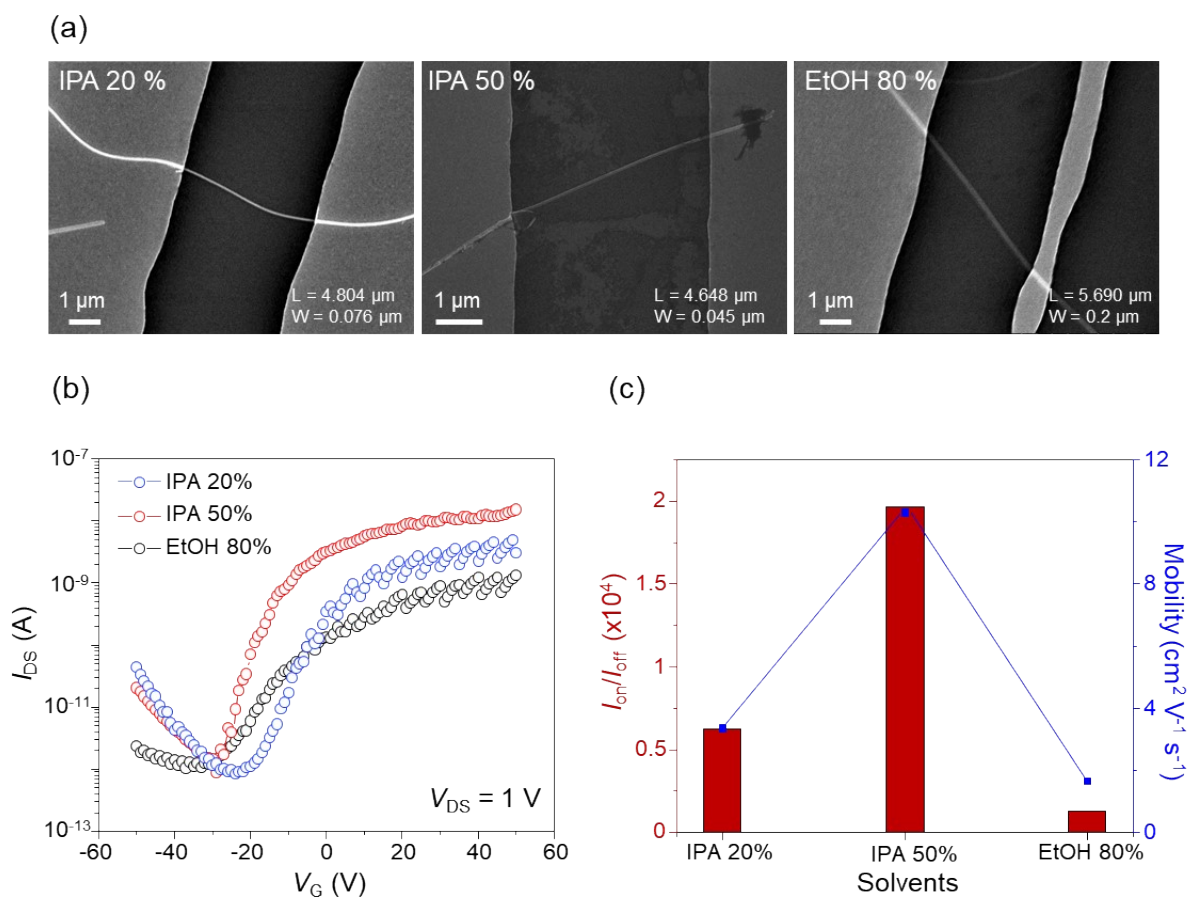

**Fig. S8** (a) SEM images of  $\text{Nb}_2\text{Pd}_3\text{Se}_8$  nanowires obtained from different co-solvent compositions. (b) Transfer curves of the devices. (c) Measured  $I_{\text{on}}/I_{\text{off}}$  and mobility of the devices.
